# Supplementary material for: The prognostic value of the myeloid-mediated immunosuppression marker Arginase-1 in classic Hodgkin lymphoma
Source: PubMed Central journal article supplement (PMC5341879; doi:10.18632/oncotarget.12024), 2016-09-14
Supplement: oncotarget-07-67333-s001.pdf [file oncotarget-07-67333-s001.pdf]

## The prognostic value of the myeloid-mediated immunosuppression marker Arginase-1 in classic Hodgkin lymphoma

### Supplementary Materials

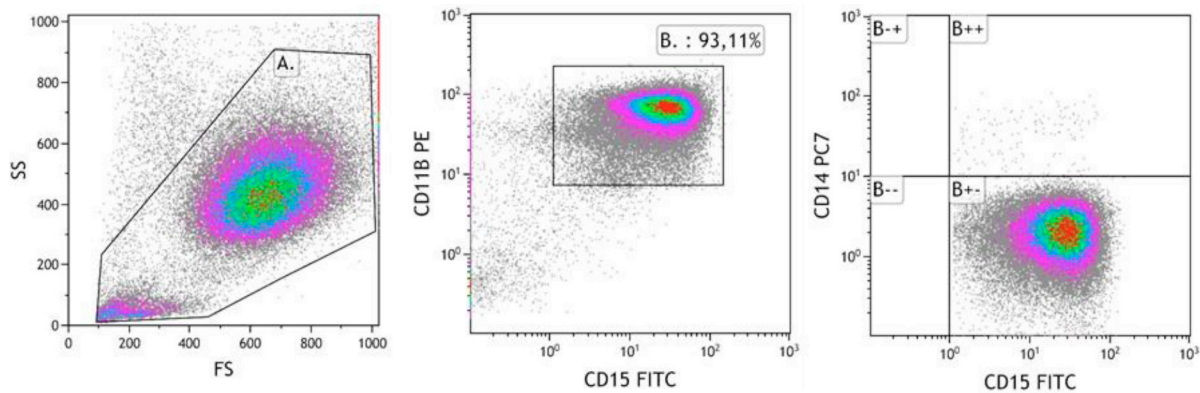

**Supplementary Figure S1: Purity assessment after neutrophils isolation.** Neutrophils were obtained after centrifugation of peripheral blood on Ficoll, followed by erythrocytes hypotonic lysis. Purity was checked by flow cytometry identifying CD15<sup>+</sup>CD11b<sup>+</sup>CD14<sup>-</sup> cells, and it was always more than 90%. An example from a MM patient is shown.

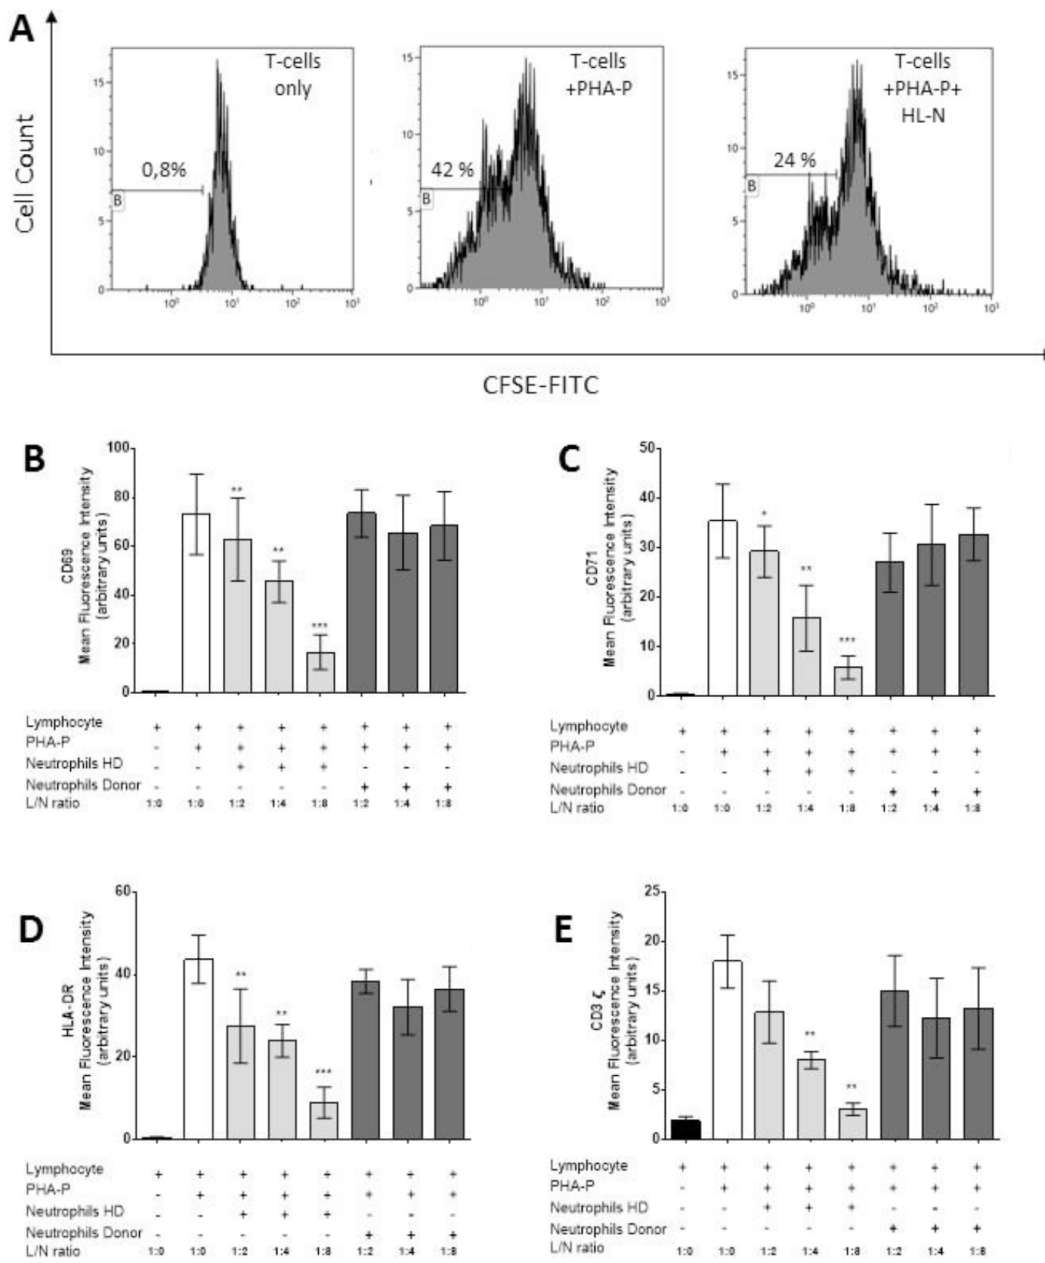

**Supplementary Figure S2: Immunosuppressive effect of HL neutrophils on T-cells.** Proliferation of T-cells from a representative experiment in presence of HL neutrophils at 1:4 ratio (A). Results at 48 hours are reported separately for activation marker expression of CD69 (B), HLA-DR (C), CD71 (D), CD3 $\zeta$ /CD247 (E) in h-Ly co-cultured with HL-N (light grey bars) or CTRL-N (dark grey bars). Results represent MFI mean  $\pm$  SD of duplicates from five donors and eight patients, and are representative of eight independent experiments. Abbreviations: h-Ly: lymphocyte from healthy volunteers; HL-N: neutrophils from HL patients; CTRL-N: neutrophils from healthy volunteers; L/N: lymphocyte/neutrophil ratio; PHA-P: phytohemagglutinin. \* $p < 0.05$ , \*\* $p < 0.001$ , \*\*\* $p < 0.0001$ .

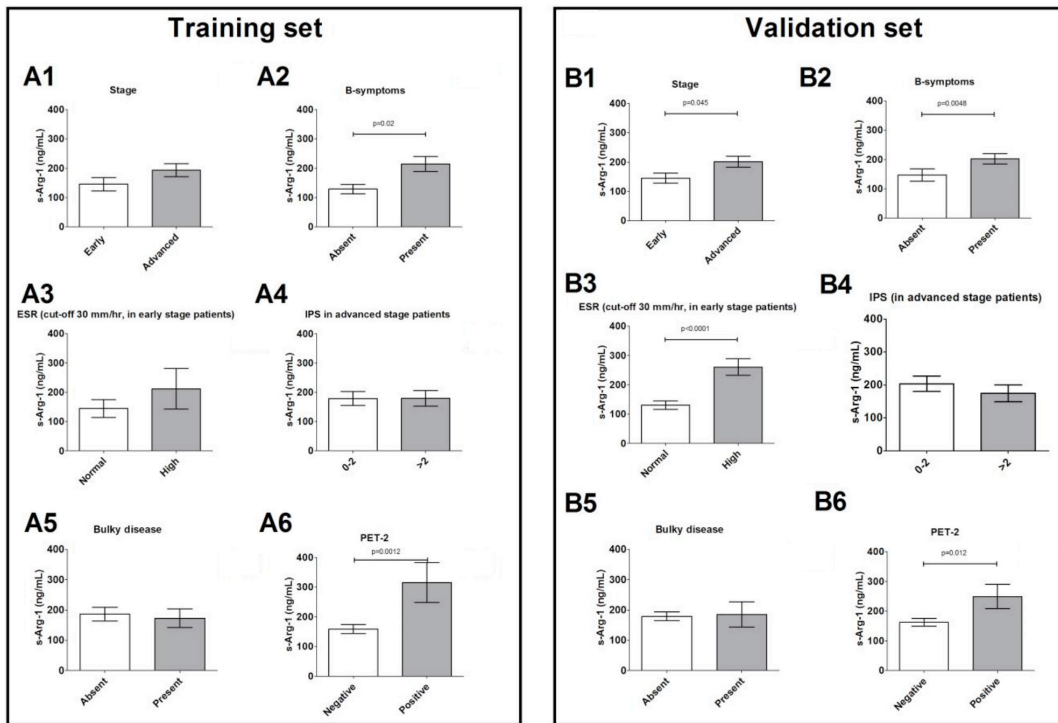

Supplementary Figure S3: Levels of s-Arg-1 and clinical features at diagnosis of HL patients.

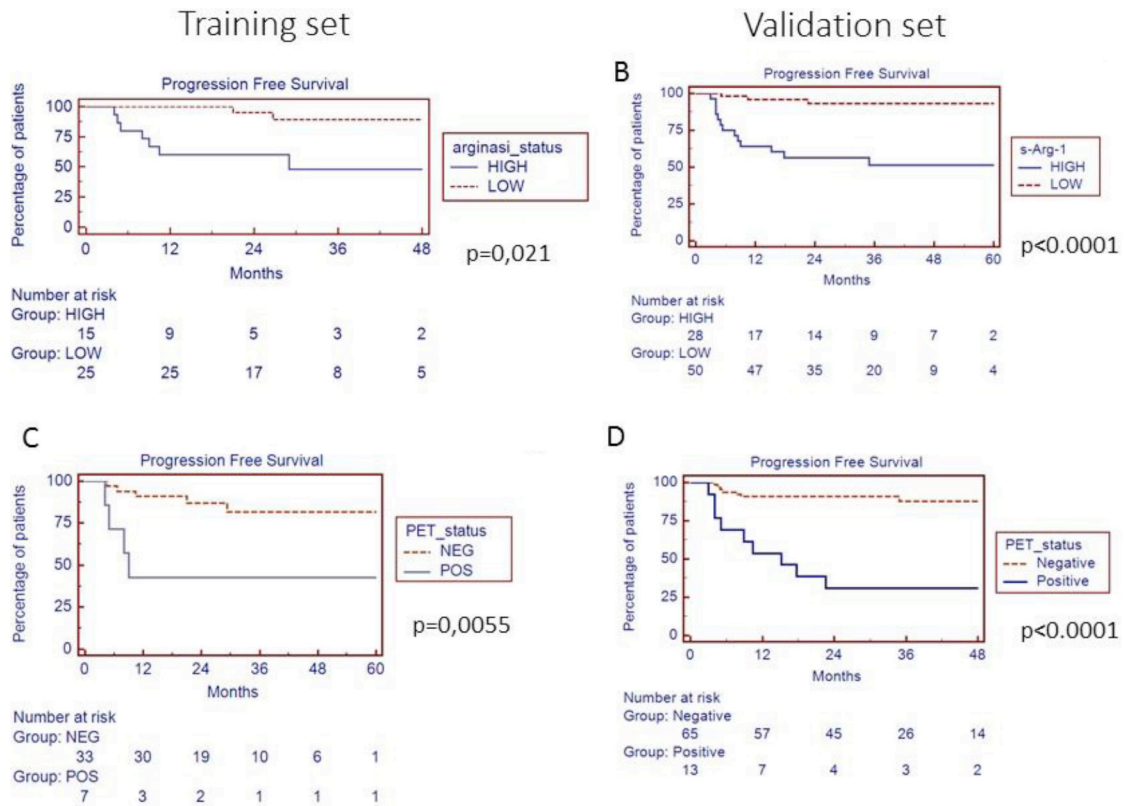

Supplementary Figure S4: Progression free survival based on s-Arg-1 at diagnosis and PET-2 scan in the training and validation set. Progression free-survival based on circulating s-Arg-1 at baseline in the training (panel A) and validation set (panel B); based on PET-2 scan in the training (panel C) and validation set (panel D).
